## Sequence analysis

# MapOptics: a light-weight, cross-platform visualization tool for optical mapping alignment

Josephine Burgin, Corentin Molitor and Fady Mohareb\*

The Bioinformatics Group, Cranfield Soil and Agrifood Institute, School of Water, Energy and Environment, Cranfield University, Bedford MK43 0AL, UK

\*To whom correspondence should be addressed.

Associate Editor: John Hancock

Received on September 16, 2018; revised on November 27, 2018; editorial decision on December 4, 2018; accepted on December 6, 2018

### Abstract

**Summary:** Bionano optical mapping is a technology that can assist in the final stages of genome assembly by lengthening and ordering scaffolds in a draft assembly by aligning the assembly to a genomic map. However, currently, tools for visualization are limited to use on a Windows operating system or are developed initially for visualizing large-scale structural variation. MapOptics is a lightweight cross-platform tool that enables the user to visualize and interact with the alignment of Bionano optical mapping data and can be used for in depth exploration of hybrid scaffolding alignments. It provides a fast, simple alternative to the large optical mapping analysis programs currently available for this area of research.

**Availability and implementation:** MapOptics is implemented in Java 1.8 and released under an MIT licence. MapOptics can be downloaded from <https://github.com/FadyMohareb/mapoptics> and run on any standard desktop computer equipped with a Java Virtual Machine (JVM).

**Contact:** [f.mohareb@cranfield.ac.uk](mailto:f.mohareb@cranfield.ac.uk)

**Supplementary information:** [Supplementary data](#) are available at *Bioinformatics* online.

### 1 Introduction

Optical mapping is a technology that gives insight into the basic structure of large DNA fragments. It can be used as an extra step to a genome assembly to improve ordering, orientation and length of scaffolds. Traditionally, optical mapping suffered from a high error rate, making it unreliable for accurate genome assemblies. However, as with the recent advances of other sequencing platforms, optical mapping has largely overcome its limitations and is now used in many genomic studies (Phillippy, 2017; Yuan *et al.*, 2017). Now available are optical maps derived from high throughput nano-channels performed by Bionano systems (Dai *et al.*, 2018; Pendleton *et al.*, 2015). With modern techniques, restriction enzyme digestion of long DNA molecules (~500 kb) is performed by one or more ‘nickase’ enzymes, modified to only digest single strands at a particular site. These sites are then repaired with fluorescent nucleotides which can be imaged to form a unique barcode on the molecule (Udall and Dawe, 2018). Even newer technologies such as Bionano Direct Label and Stain Technology (DLS) offer non-destructive

methods of creating optical maps that are even longer (>2 Mbp) with enzymes that label the sites without digestion. These long DNA molecules are assembled to form a genome consensus map. Genome assembly scaffolds can then be digested *in silico* to form barcoded molecules that can be aligned to this consensus map. During this alignment process, errors in the assembly can be recognized and corrected, therefore improving the sequence completeness and accuracy further (Jiao and Schneeberger, 2017; Seo *et al.*, 2016). Visualization post-alignment can give insight into the quality of the alignment and recognition of mis-assemblies. This is key to understand the success in the technique and in assisting manual conflict resolution to improve results further.

There are five tools currently available for visualization of optical mapping alignment: BioNumerics v7 JBrowse (Skinner *et al.*, 2009), OMView (Leung *et al.*, 2017), Bionano’s IrysView (<https://bionanogenomics.com/support-page/irysview>) and Bionano’s Access (<https://bionanogenomics.com/support-page/bionano-access>). However, only two of these tools provide views useful to a genome assembly context. The tools BioNumerics v7, JBrowse and OMView



- Pendleton, M. *et al.* (2015) Assembly and diploid architecture of an individual human genome via single-molecule technologies. *Nat. Methods*, **12**, 780–786.
- Phillippy, A.M. (2017) New advances in sequence assembly. *Genome Res*, **27**, xi–xiii.
- Seo, J.S. *et al.* (2016) De novo assembly and phasing of a Korean human genome. *Nature*, **538**, 243–247.
- Skinner, M.E. *et al.* (2009) JBrowse: a next-generation genome browser. *Genome Res.*, **19**, 1630–1638.
- Udall, J.A. and Dawe, R.K. (2018) Is it ordered correctly? Validating genome assemblies by optical mapping. *Plant Cell*, **30**, 7–14.
- Yuan, Y. *et al.* (2017) Improvements in genomic technologies: application to crop genomics. *Trends Biotechnol.*, **35**, 547–558.
